# Supplementary material for: Study on the movement mechanism of rice stem under the action of canopy-opening device based on explicit dynamics simulation
Source: Frontiers journal article supplement (doi:10.3389/fpls.2023.1252247), 2023-10-24
Supplement: Data_Sheet_1.pdf [file Data_Sheet_1.pdf]

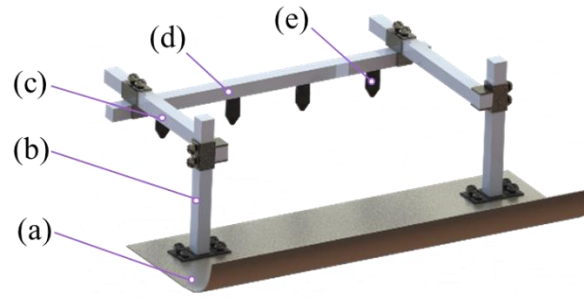

(a) The canopy-opening device, (b) Adjust the height between the canopy-opening device and the spray boom, (c) Adjust the horizontal distance between the canopy-opening device and the spray boom, (d) The spray boom, (e) The nozzle.

Figure.1. 3D model of the canopy-opening device.

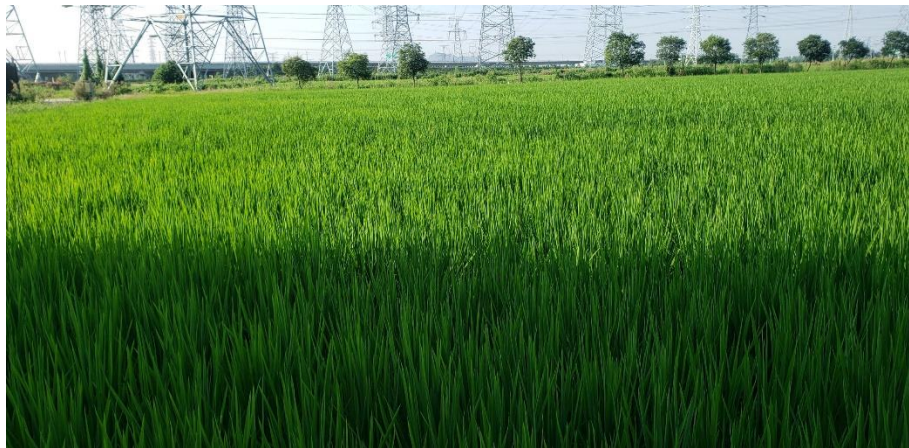

Figure.2. Rice sampling field.

Table.1. The morphological structure parameters of rice.

| <i>Average measurement of the whole rice</i>                                                                                       |                     |        |        |        |        |
|------------------------------------------------------------------------------------------------------------------------------------|---------------------|--------|--------|--------|--------|
| Dimensions                                                                                                                         | Average measurement |        |        |        |        |
|                                                                                                                                    | Leaf A              | Leaf B | Leaf C | Leaf D | Leaf E |
| Distance from leaf root to bottom of stem (mm)                                                                                     | 251.26              | 290.85 | 381.61 | 535.82 | 757.41 |
| Leaf inclination (°)                                                                                                               | 20.58               | 19.02  | 15.69  | 11.16  | 8.86   |
| Leaf length (mm)                                                                                                                   | 455.38              | 559.22 | 535.00 | 459.72 | 371.15 |
| Leaf area (cm <sup>2</sup> )                                                                                                       | 91.75               | 120.43 | 123.89 | 110.29 | 92.62  |
| Leaf width (cm)                                                                                                                    | 2.84                | 3.08   | 3.38   | 3.44   | 2.22   |
| Stem stalk diameter(mm)                                                                                                            | 9.40                | 9.27   | 8.19   | 6.62   | 4.56   |
| Horizontal deflection angle from the first leaf(°)                                                                                 | 128.57              | 44.00  | 186.63 | 129.47 |        |
| Plant height(m)                                                                                                                    |                     |        | 0.758  |        |        |
| Volume*(cm <sup>3</sup> )                                                                                                          |                     |        | 8.05   |        |        |
| Mass(g)                                                                                                                            |                     |        | 14.62  |        |        |
| <i>* Whole rice volumes have been calculated to frustum of a cone specimen density(specimen density:1815.69 kg m<sup>-3</sup>)</i> |                     |        |        |        |        |

Table.2. Parameters of strain gage.

|                                  |                |
|----------------------------------|----------------|
| Type                             | BE120-3AA-P500 |
| Resistance (Ω)                   | 120.1±0.1      |
| Gage factor                      | 2.22±1%        |
| Operating temperature range (°C) | -30~+80        |
| sensing grid element size        | 2.8×2.0        |
| Long × Width (mm)                |                |
| Strain gage substrate size       | 6.4×3.5        |
| Long × Width (mm)                |                |
